# Supplementary material for: Influence of Obesity on Short-Term Surgical Outcomes in HFrEF Patients Undergoing CABG: A Retrospective Multicenter Study
Source: MDPI journal article supplement (doi:10.3390/biomedicines12020426), 2024-02-13
Supplement: s1 [file s1]

# Supplementary Materials

**Table S1: Binary logistic regression of postoperative complications in Normal weight (BMI > 18,5 – 24,9) vs. Overweight (BMI 25 – 29,9).**

| Variable             | Total cohort<br>(n = 574)<br>100% | Normal weight<br>(n = 163)<br>28,4% | Overweight<br>(n = 245)<br>42,68% | p value               | OR    | 95% CI      | p value                |
|----------------------|-----------------------------------|-------------------------------------|-----------------------------------|-----------------------|-------|-------------|------------------------|
| Resuscitation, n (%) | 20<br>(3,48%)                     | 8 (4,91%)                           | 8 (3,29%)                         | 0,412 <sup>Chi²</sup> | 0,224 | 0,04 – 1,26 | 0,090 <sup>Wald</sup>  |
| Resternotomy, n (%)  | 36<br>(6,27%)                     | 12<br>(7,36%)                       | 14 (5,76%)                        | 0,518 <sup>Chi²</sup> | 0,997 | 0,27 – 3,62 | 0,996 <sup>Wald</sup>  |
| ECLS, n (%)          | 46<br>(85,18%)                    | 14<br>(8,58%)                       | 17 (6,10%)                        | 0,110 <sup>Chi²</sup> | 0,609 | 0,23 – 1,60 | 0,313 <sup>Wald</sup>  |
| AKI, n (%)           | 74<br>(12,89%)                    | 15<br>(9,20%)                       | 31 (15,05%)                       | 0,118 <sup>Chi²</sup> | 0,671 | 0,27 – 1,63 | 0,379 <sup>Wald</sup>  |
| Dialysis, n (%)      | 66<br>(11,49%)                    | 16<br>(9,82%)                       | 29 (11,98%)                       | 0,770 <sup>Chi²</sup> | 1,23  | 0,39 – 3,89 | 0,722 <sup>Wald</sup>  |
| OPCAB, n (%)         | 233<br>(40,59%)                   | 56<br>(34,36%)                      | 101<br>(41,22%)                   | 0,470 <sup>Chi²</sup> |       |             |                        |
| ONCAB, n (%)         | 339<br>(59,06%)                   | 107<br>(65,64%)                     | 136<br>(55,51%)                   |                       |       |             |                        |
| Stroke, n (%)        | 19<br>(3,31%)                     | 2 (1,23%)                           | 10 (4,13%)                        | 0,101 <sup>Chi²</sup> | 1,603 | 0,39 – 6,59 | 0,514 <sup>Wald</sup>  |
| Delirium, n (%)      | 98<br>(17,07%)                    | 22<br>(13,49%)                      | 35 (14,29%)                       | 0,841 <sup>Chi²</sup> | 0,489 | 0,26 – 0,95 | 0,033 <sup>Wald</sup>  |
| Mortality, n (%)     | 30<br>(5,22%)                     | 6 (3,68%)                           | 15 (6,12%)                        | 0,101 <sup>Chi²</sup> | 2,028 | 0,44 – 9,22 | 0,418 <sup>Wald</sup>  |
| Sepsis, n (%)        | 40<br>(6,96%)                     | 11<br>(6,75%)                       | 19 (7,76%)                        | 0,703 <sup>Chi²</sup> | 1,578 | 0,52 – 4,76 | <0,001 <sup>Wald</sup> |

**Table S2: Binary logistic regression of postoperative complications in Overweight (BMI 25 – 29,9) vs. Obesity (BMI > 35)**

| Variable             | Total cohort<br>(n = 574)<br>100% | Overweight<br>(n = 245)<br>42,68% | Obesity<br>(n = 158)<br>27,5% | p value               | OR    | 95% CI      | p value               |
|----------------------|-----------------------------------|-----------------------------------|-------------------------------|-----------------------|-------|-------------|-----------------------|
| Resuscitation, n (%) | 20<br>(3,48%)                     | 8 (3,29%)                         | 4 (2,53%)                     | 0,670 <sup>Chi²</sup> | 1,121 | 0,11 – 1,91 | 0,999 <sup>Wald</sup> |
| Resternotomy, n (%)  | 36<br>(6,27%)                     | 14 (5,76%)                        | 11<br>(6,96%)                 | 0,615 <sup>Chi²</sup> | 1,043 | 0,27 – 4,09 | 0,951 <sup>Wald</sup> |
| ECLS, n (%)          | 46<br>(8,18%)                     | 17 (6,10%)                        | 17<br>(10,75%)                | 0,285 <sup>Chi²</sup> | 0,712 | 0,35 – 3,27 | 0,912 <sup>Wald</sup> |
| AKI, n (%)           | 74<br>(12,89%)                    | 31 (12,05%)                       | 28<br>(17,72%)                | 0,552 <sup>Chi²</sup> | 1,137 | 0,27 – 1,98 | 0,531 <sup>Wald</sup> |
| Dialysis, n (%)      | 66<br>(11,49%)                    | 29 (11,98%)                       | 21<br>(13,29%)                | 0,595 <sup>Chi²</sup> | 1,043 | 0,32 – 6,11 | 0,643 <sup>Wald</sup> |
| OPCAB, n (%)         | 233<br>(40,59%)                   | 101<br>(41,22%)                   | 69<br>(43,67%)                | 0,639 <sup>Chi²</sup> |       |             |                       |
| ONCAB, n (%)         | 339<br>(59,06%)                   | 136<br>(55,51%)                   | 89<br>(56,33%)                |                       |       |             |                       |
| Stroke, n (%)        | 19<br>(3,31%)                     | 10 (4,13%)                        | 5 (3,29%)                     | 0,581 <sup>Chi²</sup> | 0,527 | 0,47 – 4,11 | 0,999 <sup>Wald</sup> |
| Delirium, n (%)      | 98<br>(17,07%)                    | 35 (14,29%)                       | 41<br>(26,58%)                | 0,139 <sup>Chi²</sup> | 1,903 | 0,61 – 2,60 | 0,527 <sup>Wald</sup> |
| Mortality, n (%)     | 30<br>(5,22%)                     | 15 (6,12%)                        | 11<br>(6,96%)                 | 0,855 <sup>Chi²</sup> | 1,033 | 0,53 – 2,09 | 0,241 <sup>Wald</sup> |
| Sepsis, n (%)        | 40<br>(6,96%)                     | 19 (7,76%)                        | 10<br>(6,33%)                 | 0,600 <sup>Chi²</sup> | 0,663 | 0,52 – 5,87 | 0,368 <sup>Wald</sup> |
